# Supplementary material
Source: MDPI journal article supplement (https://www.mdpi.com/2073-4395/12/12/3071)
Supplement: s1 [file s1]

**Table S1:** Monetized environmental impacts of miscanthus cultivation per hectare and year applying the ReCiPe (H) 1.13 methodology

| Impact Category                 | Environmental impact | Unit                      | Environmental prices (€ Unit <sup>-1</sup> ) | Monetized environmental impact |
|---------------------------------|----------------------|---------------------------|----------------------------------------------|--------------------------------|
| Climate change                  | 1,224.96             | kg CO <sub>2</sub> eq.    | 0.06                                         | 69.33                          |
| Fossil depletion                | 253.03               | kg oil eq.                | -                                            | -                              |
| Freshwater ecotoxicity          | 28.87                | kg 1,4-DCB eq.            | 0.04                                         | 1.04                           |
| Freshwater eutrophication       | 0.42                 | kg P eq.                  | 1.86                                         | 0.78                           |
| Human toxicity                  | 310.11               | kg 1,4-DB eq.             | 0.10                                         | 30.73                          |
| Ionizing radiation              | 42.84                | kg U <sub>235</sub> eq.   | 0.05                                         | 1,97                           |
| Land use                        | 10,128.70            | m <sup>2</sup> a crop eq. | 0.08                                         | 855.88                         |
| Marine ecotoxicity              | 26.35                | kg 1,4-DB eq.             | 0.01                                         | 0.19                           |
| Marine eutrophication           | 15.19                | kg N eq.                  | 3.11                                         | 47.23                          |
| Metal depletion                 | 71.54                | kg Fe eq.                 | -                                            | -                              |
| Ozone depletion                 | 6.95E-05             | kg CFC-11 eq.             | 30.40                                        | 2.11E-03                       |
| Particulate matter formation    | 4.06                 | kg PM <sub>10</sub> eq.   | 39.20                                        | 159.34                         |
| Photochemical oxidant formation | 4.98                 | kg NMVOC eq.              | 1.15                                         | 5.73                           |
| Terrestrial acidification       | 18.36                | kg SO <sub>2</sub> eq.    | 4.97                                         | 91.23                          |
| Terrestrial ecotoxicity         | 0.26                 | kg 1,4-DB eq.             | 8.69                                         | 2.25                           |
| Water depletion                 | 9.18                 | m <sup>3</sup> water eq.  | -                                            | -                              |
| <b>Total</b>                    | -                    | -                         | -                                            | <b>1265.71</b>                 |
